# Supplementary material
Source: publisher figshare collection journal article supplement (https://frontiersin.figshare.com/ndownloader/files/22772711)
Supplement: Supplementary file [file 22772711]

## SUPPLEMENTAL FIGURES

**Supplemental Figure 1.** Outline of assay for treatment of milk samples spiked with ceftiofur using heat treatment. For each temperature, four batch replicates were conducted, collecting samples for each time point in triplicate (except for control samples). Black filled cells indicate time points when samples were collected, and number within each cell indicates number of samples collected for each batch. **Ct**: milk collected following spiking and mixing of milk at room temperature, prior to any heat treatment. \*sample was collected once milk reached desired treatment temperature. **LTLT**: 145° F (63°C) for 30 min; **HTST**: 161°F (72°C) for 15 seconds; **HTLT**: 197.6° F (92°C) for 20 min.

| Treatment Groups | Sampling Time Points |    |        |        |        |
|------------------|----------------------|----|--------|--------|--------|
|                  | Ct                   | 0* | 15 sec | 20 min | 30 min |
| LTLT             | 3                    | 1  |        |        | 3      |
| HTST             |                      | 1  | 3      |        |        |
| HTLT             |                      | 1  |        | 3      |        |
| Control          |                      |    | 1      | 1      | 1      |

**Supplemental Figure 2.** Outline of assay for treatment of milk spiked with ceftiofur using pH. For each pH treatment group, four batch replicates were conducted, collecting samples for each time point in triplicate (except for control samples). Black filled cells indicate time points when samples were collected, and number within each cell indicates number of samples collected for each batch. **Ct**: milk collected following spiking and mixing of milk at room temperature, prior to any pH treatment. \* sample was collected once milk reached treatment desired pH. **HpH**: pH = 10.0; **LpH**: pH = 4.0.

| Treatment Groups | Sampling Time Points |    |        |        |
|------------------|----------------------|----|--------|--------|
|                  | Ct                   | 0* | 12 hrs | 24 hrs |
| HpH              | 1                    | 3  | 3      | 3      |
| LpH              |                      | 3  | 3      | 3      |
| Control          |                      |    | 1      | 1      |

**Ct**: milk collected following spiking and mixing of milk at room temperature, prior to any pH treatment. \* sample was collected once milk reached treatment desired pH. **HpH**: pH = 10.0; **LpH**: pH = 4.0.
